# Supplementary material for: Anticancer potential of copper(i) complexes based on isopropyl ester derivatives of bis(pyrazol-1-yl)acetate ligands
Source: Royal Society of Chemistry journal article supplement (doi:10.1039/d4md00610k), 2024-11-13
Supplement: d4md00610k1.pdf [file d4md00610k1.pdf]

# Anticancer potential of copper(I) complexes based on isopropyl ester derivatives of bis(pyrazol-1-yl)acetate ligands

Maura Pellei,<sup>a</sup> Carlo Santini,<sup>a\*</sup> Miriam Caviglia,<sup>a</sup> Jo' Del Gobbo,<sup>a</sup> Chiara Battocchio,<sup>b</sup> Carlo Meneghini,<sup>b</sup> Simone Amatori,<sup>b</sup> Chiara Donati,<sup>c</sup> Eleonora Zampieri,<sup>c</sup> Valentina Gandin<sup>c\*</sup>  
Cristina Marzano,<sup>c</sup>

<sup>a</sup>*School of Science and Technology, Chemistry Division, University of Camerino, via Madonna delle Carceri (ChIP), 62032 Camerino, Italy*

<sup>b</sup>*Department of Science, Roma Tre University, Via della Vasca Navale 79, 00146 Roma, Italy*

<sup>c</sup>*Department of Pharmaceutical and Pharmacological Sciences, University of Padova, via Marzolo 5, 35131 Padova, Italy*

\*Correspondence: [carlo.santini@unicam.it](mailto:carlo.santini@unicam.it); [valentina.gandin@unipd.it](mailto:valentina.gandin@unipd.it);

## Supplementary material

### Table of Contents:

**Figure S1.** FT-IR spectrum of HC(pz)<sub>2</sub>COO<sup>i</sup>Pr (L<sup>O<sup>i</sup>Pr</sup>).

**Figure S2.** <sup>1</sup>H-NMR spectrum of HC(pz)<sub>2</sub>COO<sup>i</sup>Pr (L<sup>O<sup>i</sup>Pr</sup>) in CD<sub>3</sub>CN.

**Figure S3.** <sup>13</sup>C{<sup>1</sup>H}-NMR spectrum of HC(pz)<sub>2</sub>COO<sup>i</sup>Pr (L<sup>O<sup>i</sup>Pr</sup>) in CD<sub>3</sub>CN.

**Figure S4.** FT-IR spectrum of HC(3,5-Me<sub>2</sub>pz)<sub>2</sub>CH(COO<sup>i</sup>Pr) (L<sup>2O<sup>i</sup>Pr</sup>).

**Figure S5.** <sup>1</sup>H-NMR spectrum of HC(3,5-Me<sub>2</sub>pz)<sub>2</sub>CH(COO<sup>i</sup>Pr) (L<sup>2O<sup>i</sup>Pr</sup>) in CDCl<sub>3</sub>.

**Figure S6.** <sup>13</sup>C{<sup>1</sup>H}-NMR spectrum of HC(3,5-Me<sub>2</sub>pz)<sub>2</sub>CH(COO<sup>i</sup>Pr) (L<sup>2O<sup>i</sup>Pr</sup>) in CDCl<sub>3</sub>.

**Figure S7.** FT-IR spectrum of [Cu(L<sup>O<sup>i</sup>Pr</sup>)(PPh<sub>3</sub>)]PF<sub>6</sub> (**1**).

**Figure S8.** <sup>1</sup>H-NMR spectrum of [Cu(L<sup>O<sup>i</sup>Pr</sup>)(PPh<sub>3</sub>)]PF<sub>6</sub> (**1**) in CD<sub>3</sub>CN.

**Figure S9.** <sup>1</sup>H-NMR spectrum of [Cu(L<sup>O<sup>i</sup>Pr</sup>)(PPh<sub>3</sub>)]PF<sub>6</sub> (**1**) in CDCl<sub>3</sub>.

**Figure S10.** <sup>13</sup>C{<sup>1</sup>H}-NMR spectrum of [Cu(L<sup>O<sup>i</sup>Pr</sup>)(PPh<sub>3</sub>)]PF<sub>6</sub> (**1**) in CD<sub>3</sub>CN.

**Figure S11.** <sup>31</sup>P{<sup>1</sup>H}-NMR spectrum of [Cu(L<sup>O<sup>i</sup>Pr</sup>)(PPh<sub>3</sub>)]PF<sub>6</sub> (**1**) in CD<sub>3</sub>CN at 293K.

**Figure S12.** <sup>31</sup>P{<sup>1</sup>H}-NMR spectrum of [Cu(L<sup>O<sup>i</sup>Pr</sup>)(PPh<sub>3</sub>)]PF<sub>6</sub> (**1**) in CD<sub>3</sub>CN at 243K.

**Figure S13.** ESI-MS(+) spectrum in CH<sub>3</sub>CN of [Cu(L<sup>O<sup>i</sup>Pr</sup>)(PPh<sub>3</sub>)]PF<sub>6</sub> (**1**).

**Figure S14.** FT-IR spectrum of [Cu(L<sup>O<sup>i</sup>Pr</sup>)(PTA)]PF<sub>6</sub> (**2**).

**Figure S15.** <sup>1</sup>H-NMR spectrum of [Cu(L<sup>O<sup>i</sup>Pr</sup>)(PTA)]PF<sub>6</sub> (**2**) in CD<sub>3</sub>CN.

**Figure S16.** <sup>1</sup>H-NMR spectrum of [Cu(L<sup>O<sup>i</sup>Pr</sup>)(PTA)]PF<sub>6</sub> (**2**) in CD<sub>3</sub>OD.

**Figure S17.** <sup>13</sup>C{<sup>1</sup>H}-NMR spectrum of [Cu(L<sup>O<sup>i</sup>Pr</sup>)(PTA)]PF<sub>6</sub> (**2**) in CD<sub>3</sub>CN.

**Figure S18.** <sup>31</sup>P{<sup>1</sup>H}-NMR spectrum of [Cu(L<sup>O<sup>i</sup>Pr</sup>)(PTA)]PF<sub>6</sub> (**2**) in CD<sub>3</sub>CN at 293K.

**Figure S19.** <sup>31</sup>P{<sup>1</sup>H}-NMR spectrum of [Cu(L<sup>O<sup>i</sup>Pr</sup>)(PTA)]PF<sub>6</sub> (**2**) in CD<sub>3</sub>CN at 243K.

- Figure S20.** ESI-MS(+) spectrum in CH<sub>3</sub>CN of [Cu(L<sup>2Oipr</sup>)(PTA)]PF<sub>6</sub> (**2**).
- Figure S21.** FT-IR spectrum of [Cu(L<sup>2Oipr</sup>)(PPh<sub>3</sub>)]PF<sub>6</sub> (**3**).
- Figure S22.** <sup>1</sup>H-NMR spectrum of [Cu(L<sup>2Oipr</sup>)(PPh<sub>3</sub>)]PF<sub>6</sub> (**3**) in CD<sub>3</sub>CN.
- Figure S23.** <sup>1</sup>H-NMR spectrum of [Cu(L<sup>2Oipr</sup>)(PPh<sub>3</sub>)]PF<sub>6</sub> (**3**) in CDCl<sub>3</sub>.
- Figure S24.** <sup>13</sup>C{<sup>1</sup>H}-NMR spectrum of [Cu(L<sup>2Oipr</sup>)(PPh<sub>3</sub>)]PF<sub>6</sub> (**3**) in CD<sub>3</sub>CN.
- Figure S25.** <sup>31</sup>P{<sup>1</sup>H}-NMR spectrum of [Cu(L<sup>2Oipr</sup>)(PPh<sub>3</sub>)]PF<sub>6</sub> (**3**) in CD<sub>3</sub>CN at 293K.
- Figure S26.** <sup>31</sup>P{<sup>1</sup>H}-NMR spectrum of [Cu(L<sup>2Oipr</sup>)(PPh<sub>3</sub>)]PF<sub>6</sub> (**3**) in CD<sub>3</sub>CN at 243K.
- Figure S27.** ESI-MS(+) spectrum of [Cu(L<sup>2Oipr</sup>)(PPh<sub>3</sub>)]PF<sub>6</sub> (**3**).
- Figure S28.** FT-IR spectrum of [Cu(L<sup>2Oipr</sup>)(PTA)]PF<sub>6</sub> (**4**).
- Figure S29.** <sup>1</sup>H-NMR spectrum of [Cu(L<sup>2Oipr</sup>)(PTA)]PF<sub>6</sub> (**4**) in DMSO-d<sub>6</sub>.
- Figure S30.** <sup>1</sup>H-NMR spectrum of [Cu(L<sup>2Oipr</sup>)(PTA)]PF<sub>6</sub> (**4**) in CD<sub>3</sub>CN.
- Figure S31.** <sup>13</sup>C{<sup>1</sup>H}-NMR spectrum of [Cu(L<sup>2Oipr</sup>)(PTA)]PF<sub>6</sub> (**4**) in CD<sub>3</sub>CN.
- Figure S32.** <sup>31</sup>P{<sup>1</sup>H}-NMR spectrum of [Cu(L<sup>2Oipr</sup>)(PTA)]PF<sub>6</sub> (**4**) in CD<sub>3</sub>CN at 293K.
- Figure S33.** <sup>31</sup>P{<sup>1</sup>H}-NMR spectrum of [Cu(L<sup>2Oipr</sup>)(PTA)]PF<sub>6</sub> (**4**) in CD<sub>3</sub>CN at 243K.
- Figure S34.** ESI-MS(+) spectrum in CH<sub>3</sub>CN of [Cu(L<sup>2Oipr</sup>)(PTA)]PF<sub>6</sub> (**4**).
- Figure S35.** Stability studies by <sup>1</sup>H-NMR.
- Table S1.** XPS data (BE, FWHM, experimental and theoretical atomic ratios and proposed assignments) collected on complex (**3**).

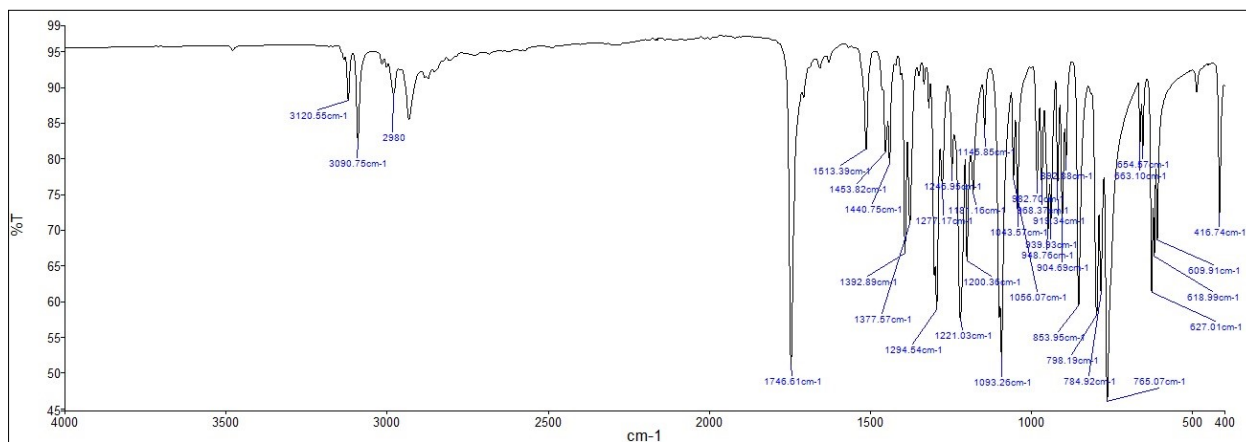

**Figure S1.** FT-IR spectrum of HC(pz)<sub>2</sub>COO<sup>i</sup>Pr (L<sup>O</sup>iPr).

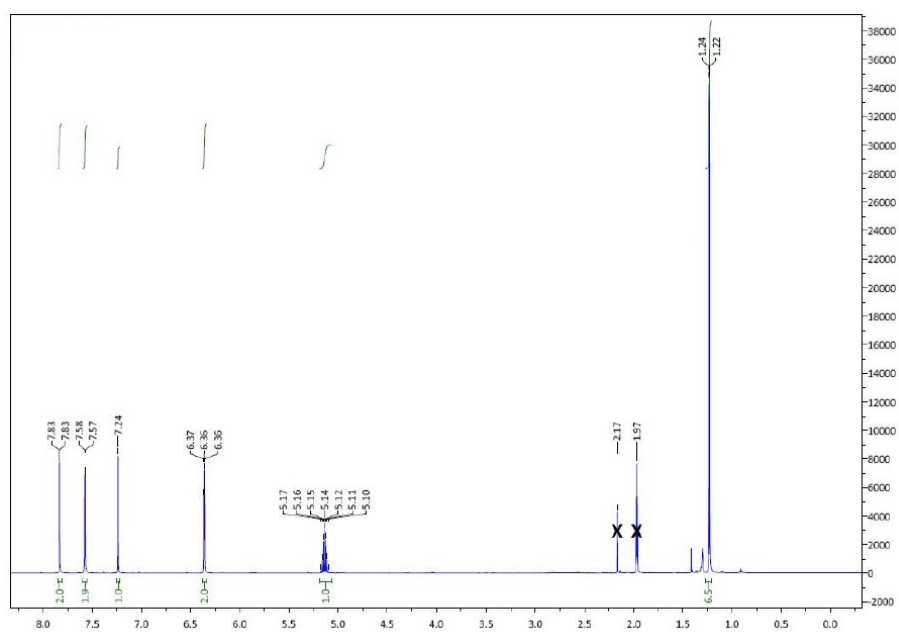

**Figure S2.** <sup>1</sup>H-NMR spectrum of HC(pz)<sub>2</sub>COO<sup>i</sup>Pr (L<sup>O</sup>iPr) in CD<sub>3</sub>CN.

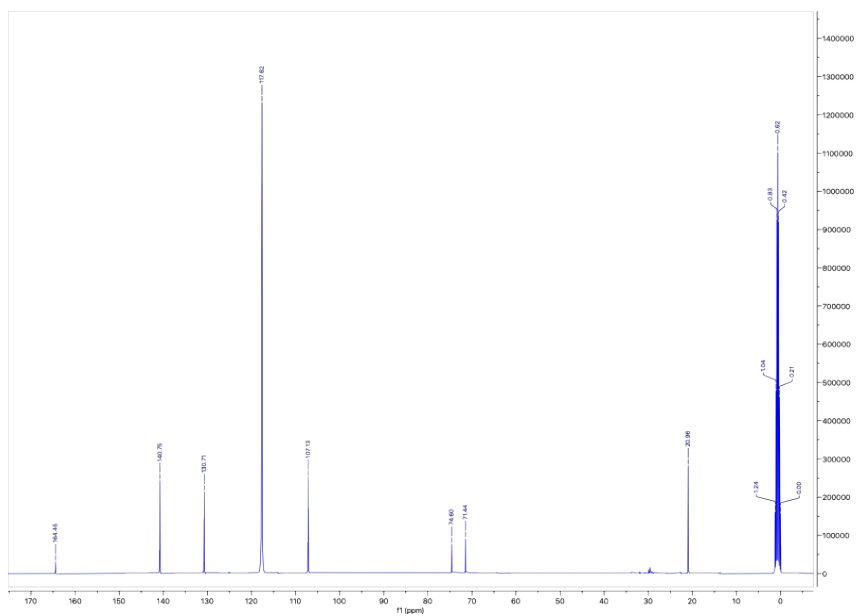

**Figure S3.**  $^{13}\text{C}\{^1\text{H}\}$ -NMR spectrum of  $\text{HC}(\text{pz})_2\text{COO}^i\text{Pr}$  ( $\text{L}^{\text{OiPr}}$ ) in  $\text{CD}_3\text{CN}$ .

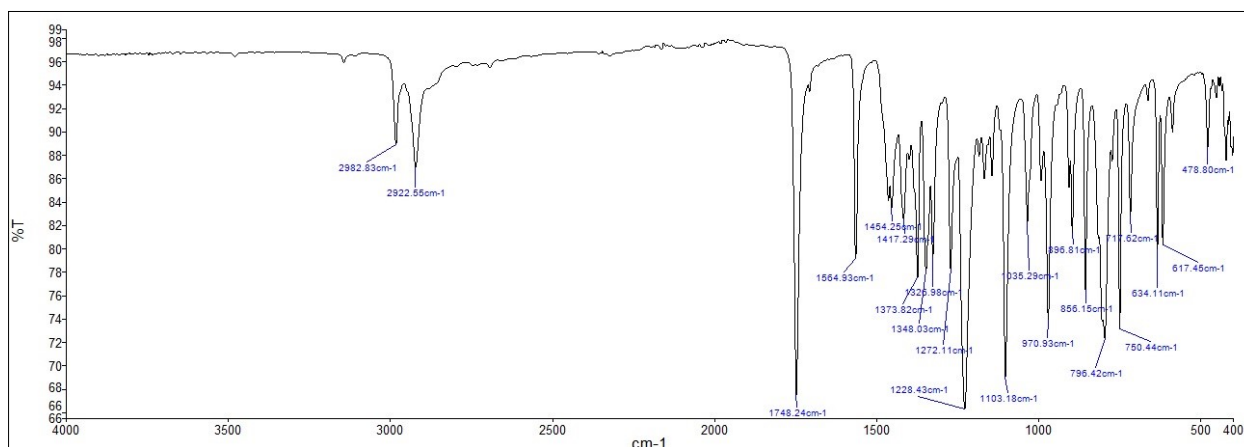

**Figure S4.** FT-IR spectrum of  $\text{HC}(3,5\text{-Me}_2\text{pz})_2\text{CH}(\text{COO}^i\text{Pr})$  ( $\text{L}^{2\text{OiPr}}$ ).

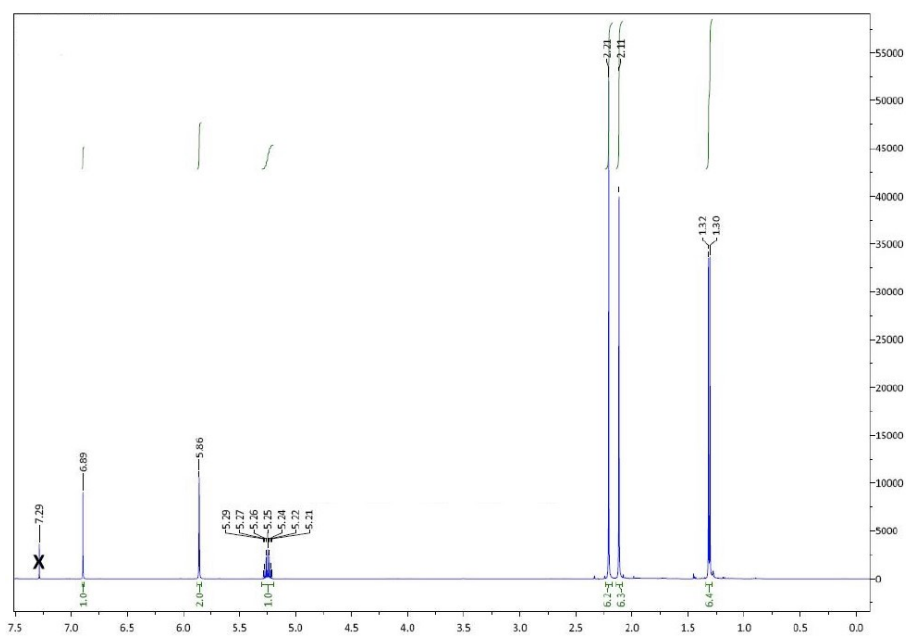

**Figure S5.**  $^1\text{H}$ -NMR spectrum of  $\text{HC}(3,5\text{-Me}_2\text{pz})_2\text{CH}(\text{COO}^i\text{Pr})$  ( $\text{L}^{2\text{O}i\text{Pr}}$ ) in  $\text{CDCl}_3$ .

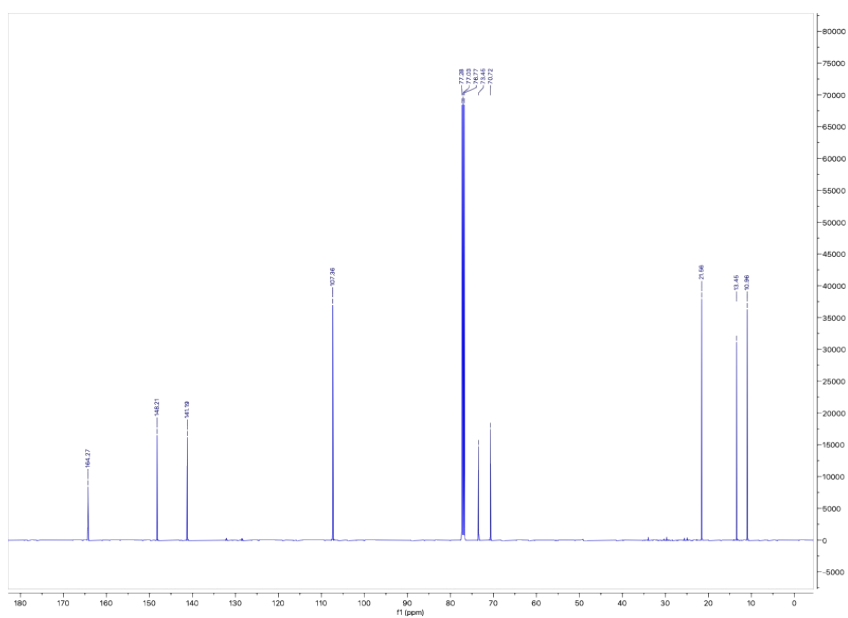

**Figure S6.**  $^{13}\text{C}\{^1\text{H}\}$ -NMR spectrum of  $\text{HC}(3,5\text{-Me}_2\text{pz})_2\text{CH}(\text{COO}^i\text{Pr})$  ( $\text{L}^{2\text{O}i\text{Pr}}$ ) in  $\text{CDCl}_3$ .

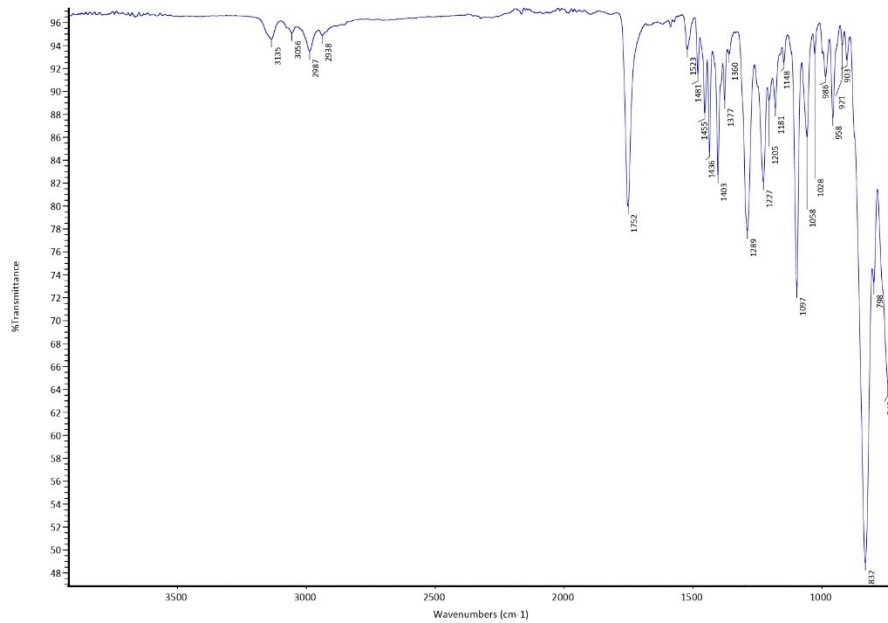

**Figure S7.** FT-IR spectrum of  $[\text{Cu}(\text{L}^{\text{Oipr}})(\text{PPh}_3)]\text{PF}_6$  (**1**).

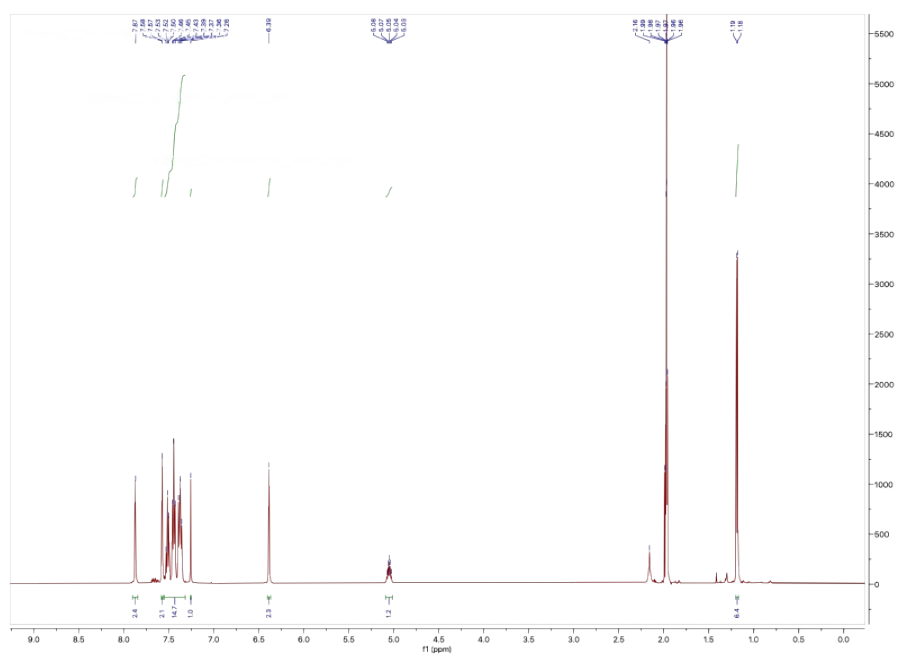

**Figure S8.**  $^1\text{H}$ -NMR spectrum of  $[\text{Cu}(\text{L}^{\text{Oipr}})(\text{PPh}_3)]\text{PF}_6$  (**1**) in  $\text{CD}_3\text{CN}$ .

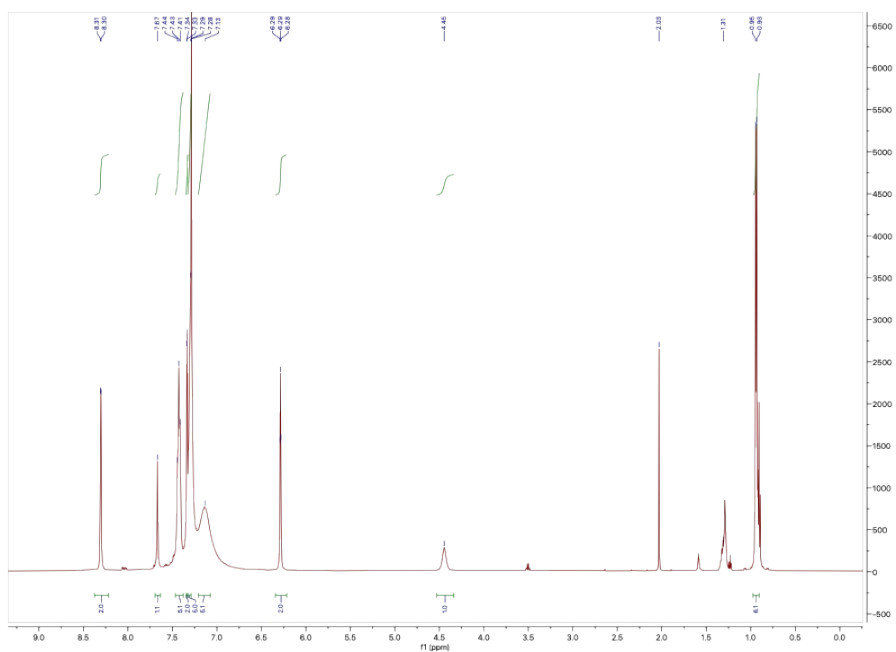

**Figure S9.**  $^1\text{H}$ -NMR spectrum of  $[\text{Cu}(\text{L}^{\text{OiPr}})(\text{PPh}_3)]\text{PF}_6$  (**1**) in  $\text{CDCl}_3$ .

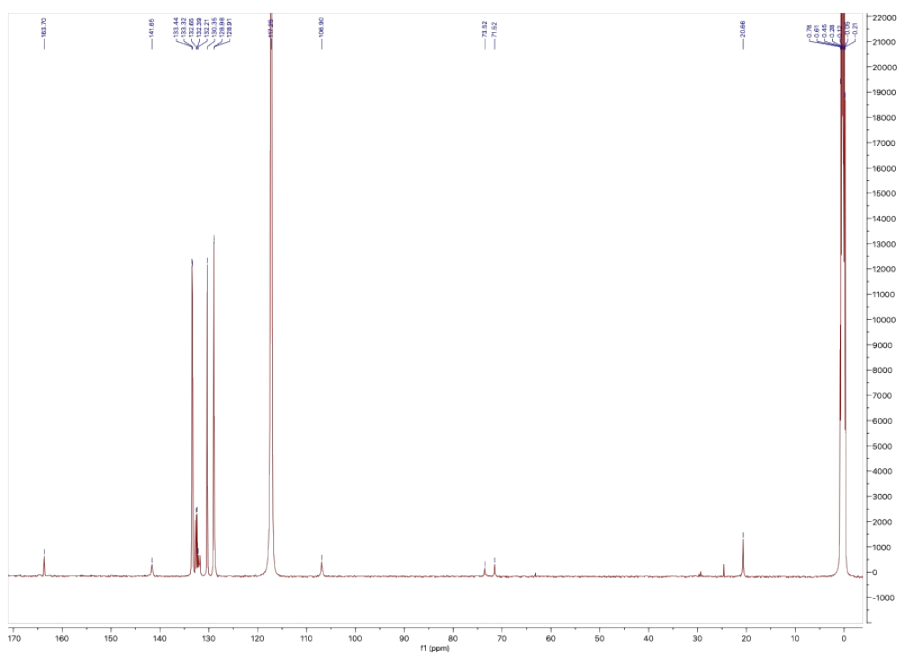

**Figure S10.**  $^{13}\text{C}\{^1\text{H}\}$ -NMR spectrum of  $[\text{Cu}(\text{L}^{\text{OiPr}})(\text{PPh}_3)]\text{PF}_6$  (**1**) in  $\text{CD}_3\text{CN}$ .

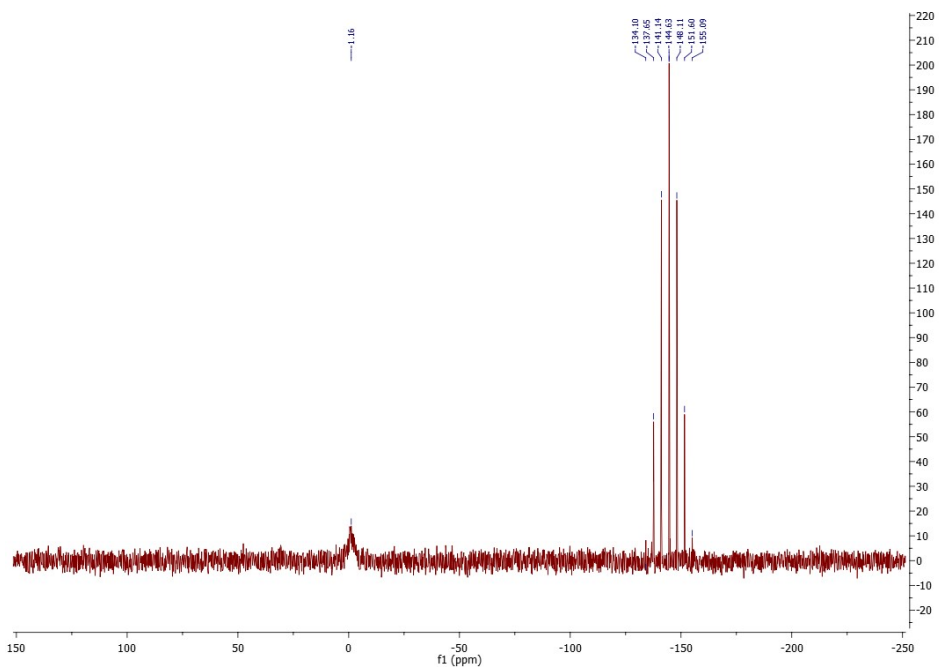

**Figure S11.** <sup>31</sup>P{<sup>1</sup>H}-NMR spectrum of [Cu(L<sup>OiPr</sup>)(PPh<sub>3</sub>)]PF<sub>6</sub> (**1**) in CD<sub>3</sub>CN at 293K.

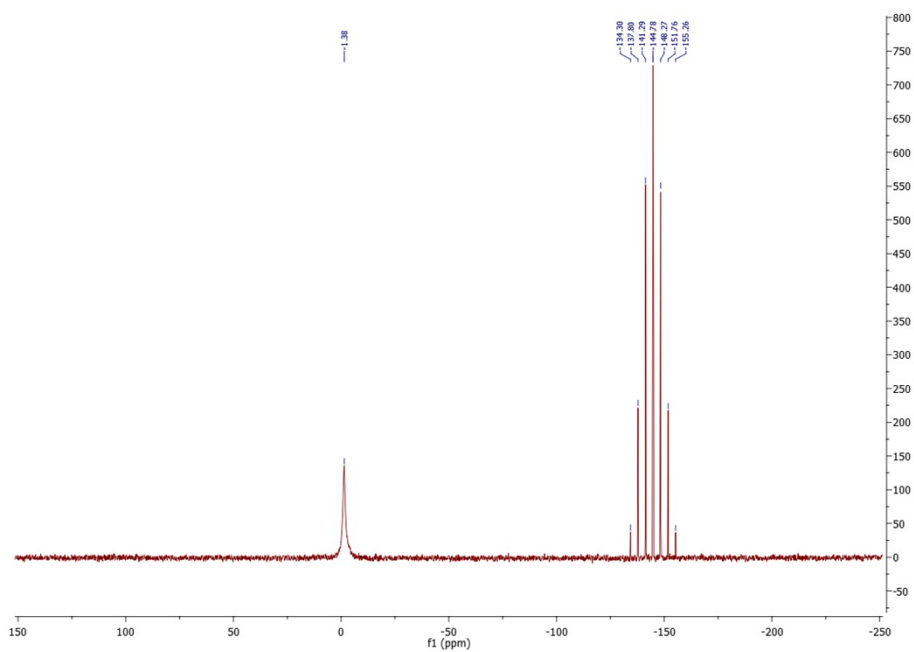

**Figure S12.** <sup>31</sup>P{<sup>1</sup>H}-NMR spectrum of [Cu(L<sup>OiPr</sup>)(PPh<sub>3</sub>)]PF<sub>6</sub> (**1**) in CD<sub>3</sub>CN at 243K.



PPh<sub>3</sub>CuLOiPr.2  
22072701 24 (0.242) Cm (17:25)

Scan ES+  
1.69e8

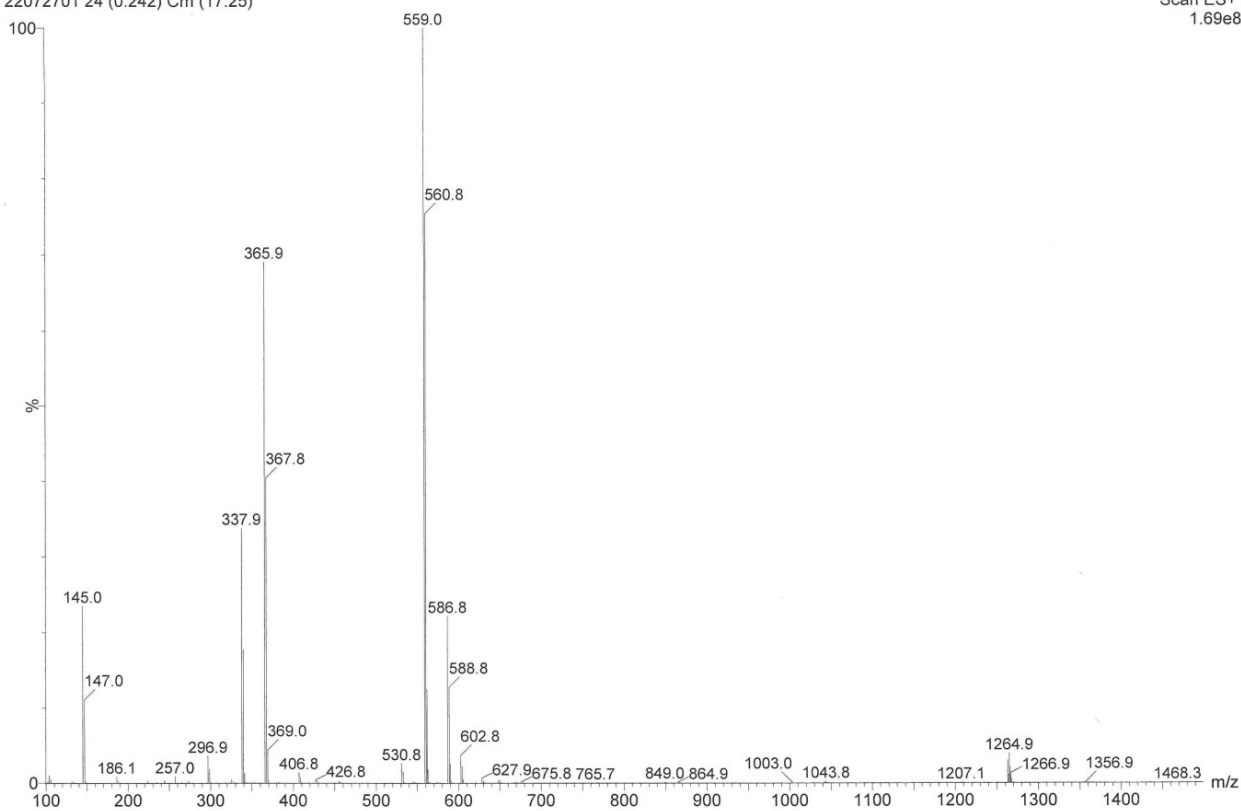

Figure S13. ESI-MS(+) spectrum in CH<sub>3</sub>CN of [Cu(L<sup>OiPr</sup>)(PPh<sub>3</sub>)]PF<sub>6</sub> (1).

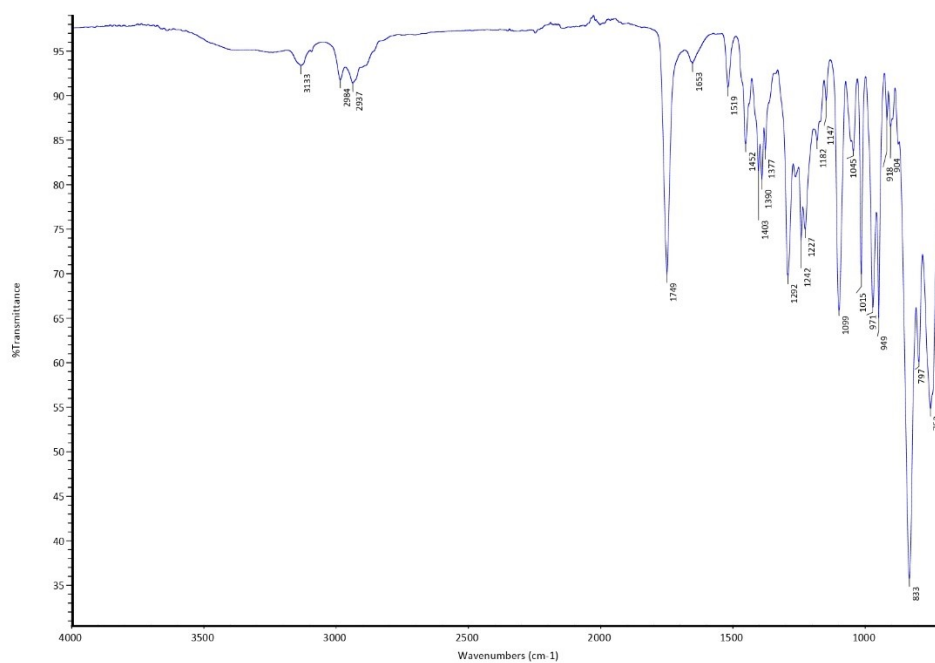

Figure S14. FT-IR spectrum of [Cu(L<sup>OiPr</sup>)(PTA)]PF<sub>6</sub> (2).

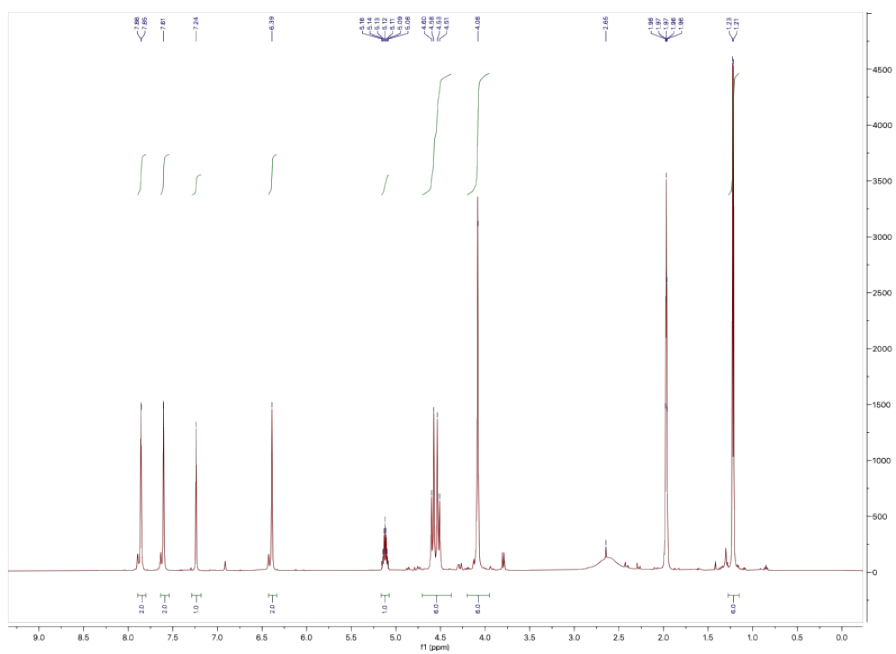

**Figure S15.** <sup>1</sup>H-NMR spectrum of [Cu(L<sup>Oipr</sup>)(PTA)]PF<sub>6</sub> (**2**) in CD<sub>3</sub>CN.

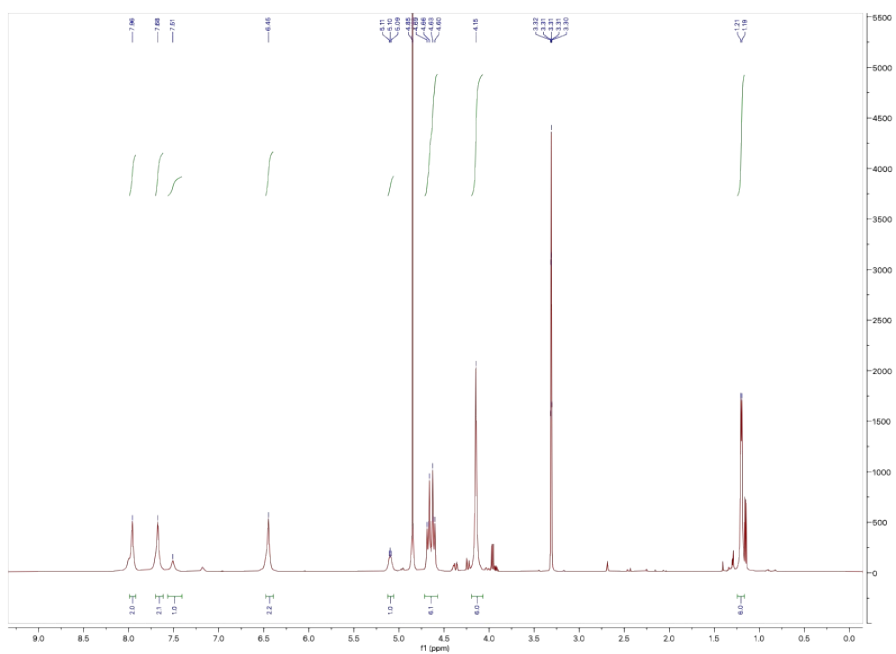

**Figure S16.** <sup>1</sup>H-NMR spectrum of [Cu(L<sup>Oipr</sup>)(PTA)]PF<sub>6</sub> (**2**) in CD<sub>3</sub>OD.

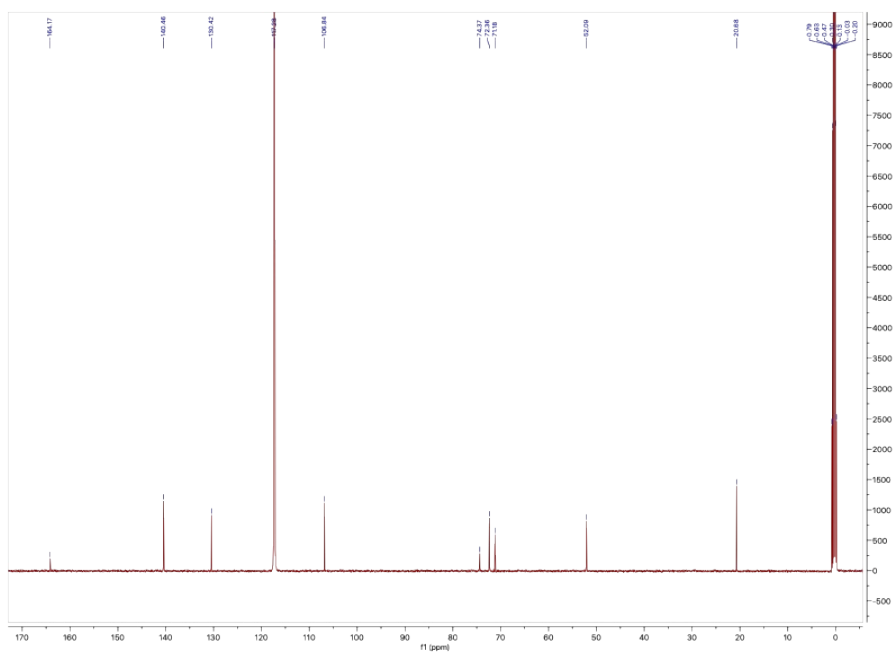

**Figure S17.**  $^{13}\text{C}\{^1\text{H}\}$ -NMR spectrum of  $[\text{Cu}(\text{L}^{\text{Oipr}})(\text{PTA})]\text{PF}_6$  (**2**) in  $\text{CD}_3\text{CN}$ .

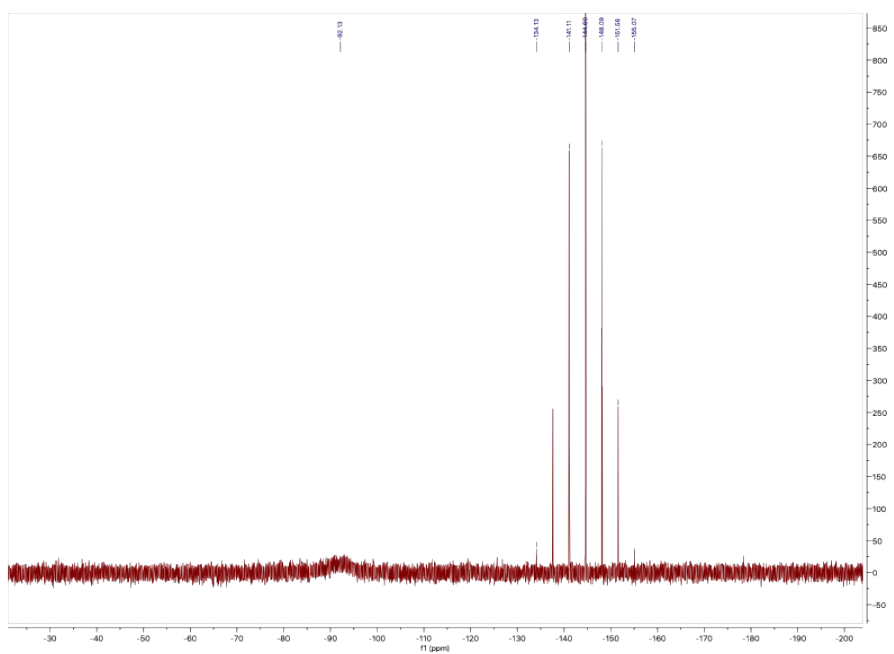

**Figure S18.**  $^{31}\text{P}\{^1\text{H}\}$ -NMR spectrum of  $[\text{Cu}(\text{L}^{\text{Oipr}})(\text{PTA})]\text{PF}_6$  (**2**) in  $\text{CD}_3\text{CN}$  at 293K.

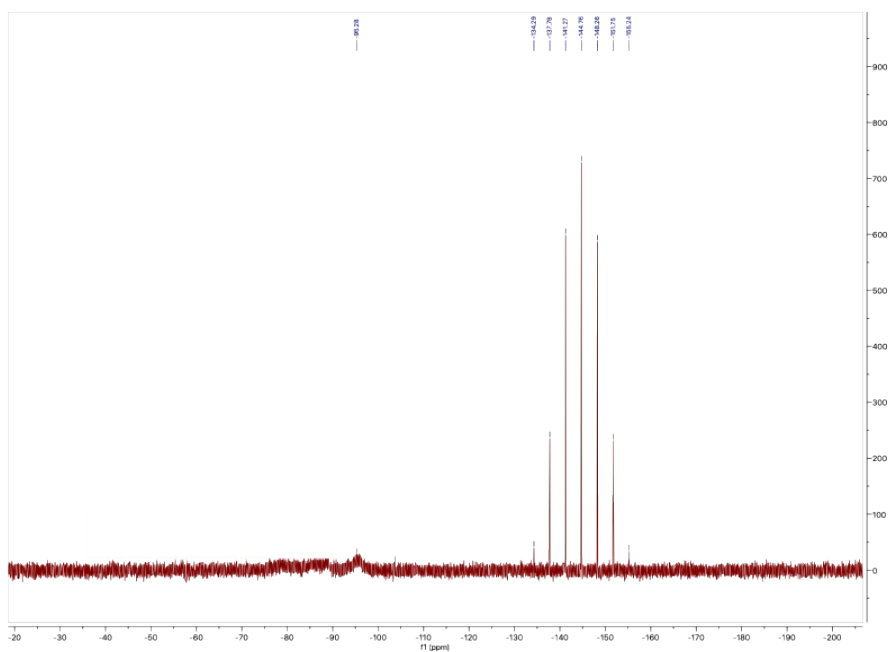

**Figure S19.**  $^{31}\text{P}\{^1\text{H}\}$ -NMR spectrum of  $[\text{Cu}(\text{L}^{\text{OiPr}})(\text{PTA})]\text{PF}_6$  (**2**) in  $\text{CD}_3\text{CN}$  at 243K.

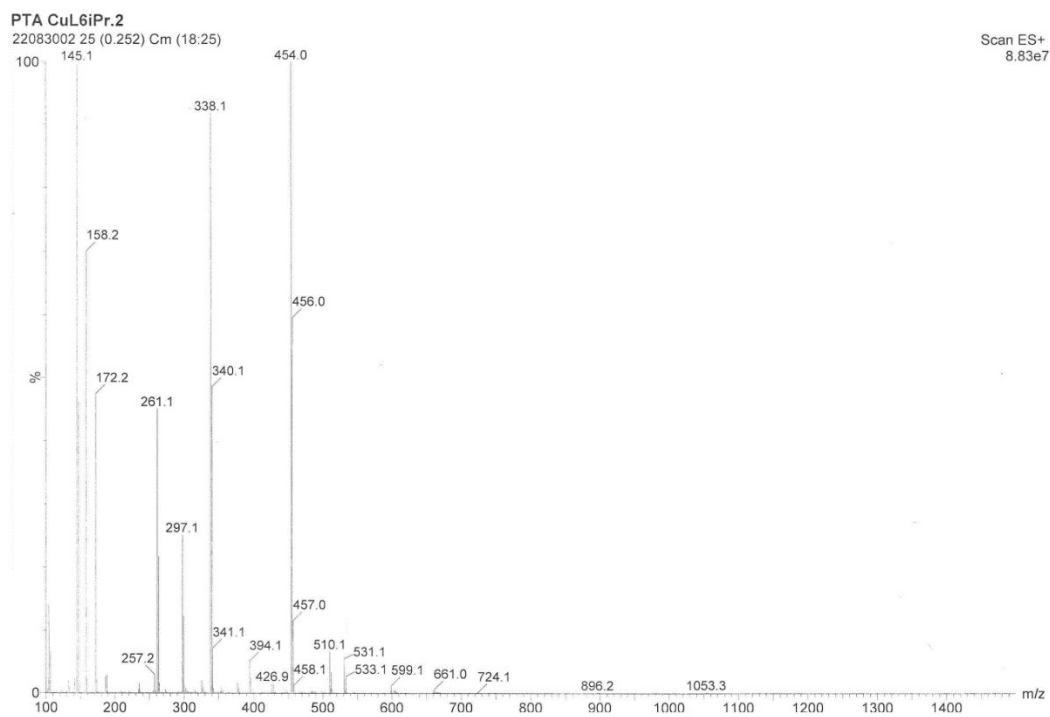

**Figure S20.** ESI-MS(+) spectrum in  $\text{CH}_3\text{CN}$  of  $[\text{Cu}(\text{L}^{\text{OiPr}})(\text{PTA})]\text{PF}_6$  (**2**).

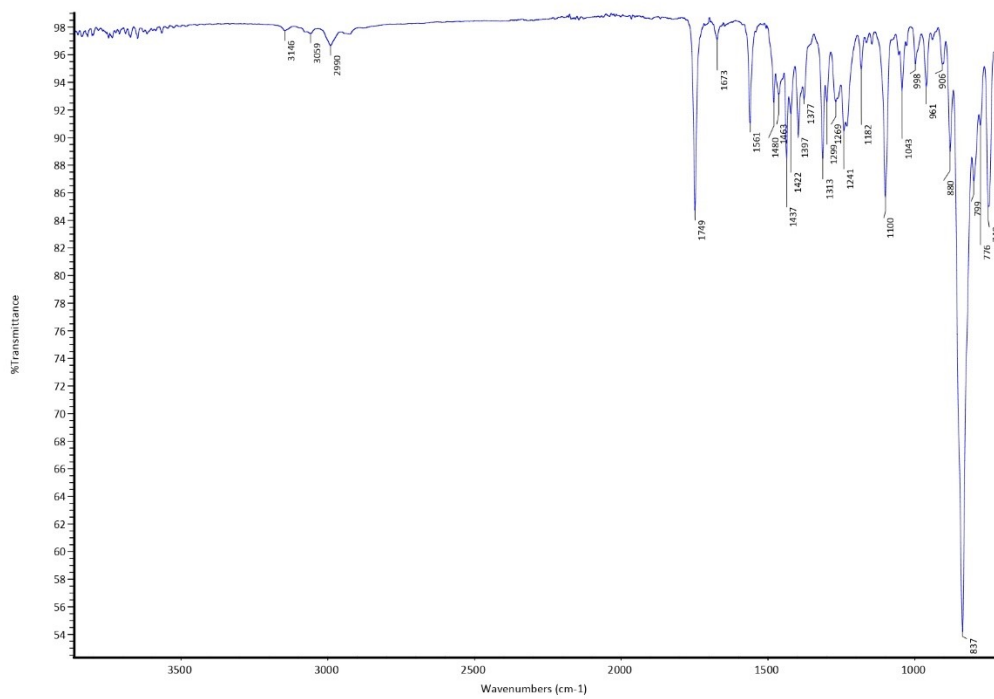

**Figure S21.** FT-IR spectrum of  $[\text{Cu}(\text{L}^{2\text{O}i\text{Pr}})(\text{PPh}_3)]\text{PF}_6$  (**3**).

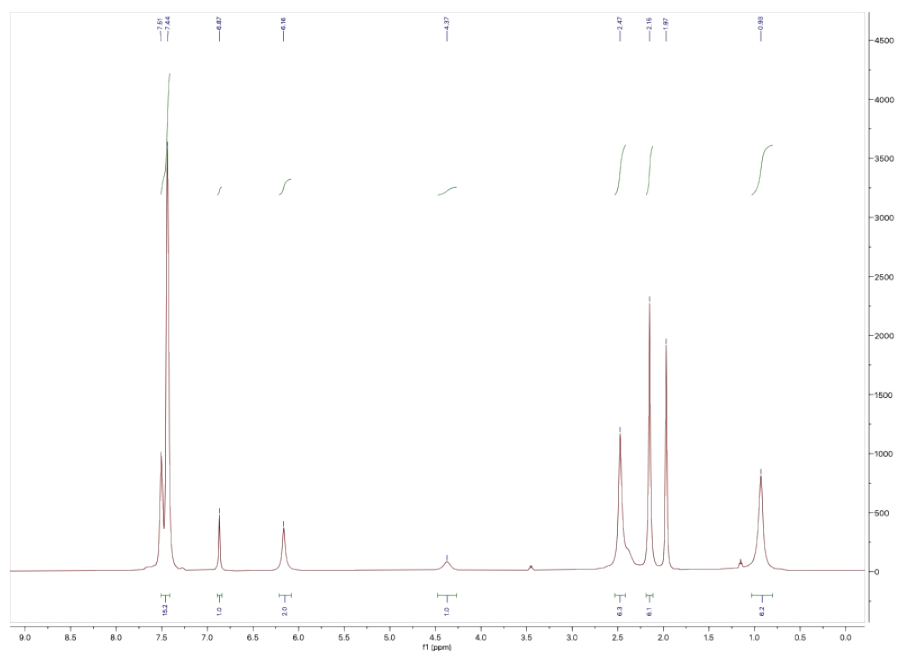

**Figure S22.**  $^1\text{H-NMR}$  spectrum of  $[\text{Cu}(\text{L}^{2\text{O}i\text{Pr}})(\text{PPh}_3)]\text{PF}_6$  (**3**) in  $\text{CD}_3\text{CN}$ .

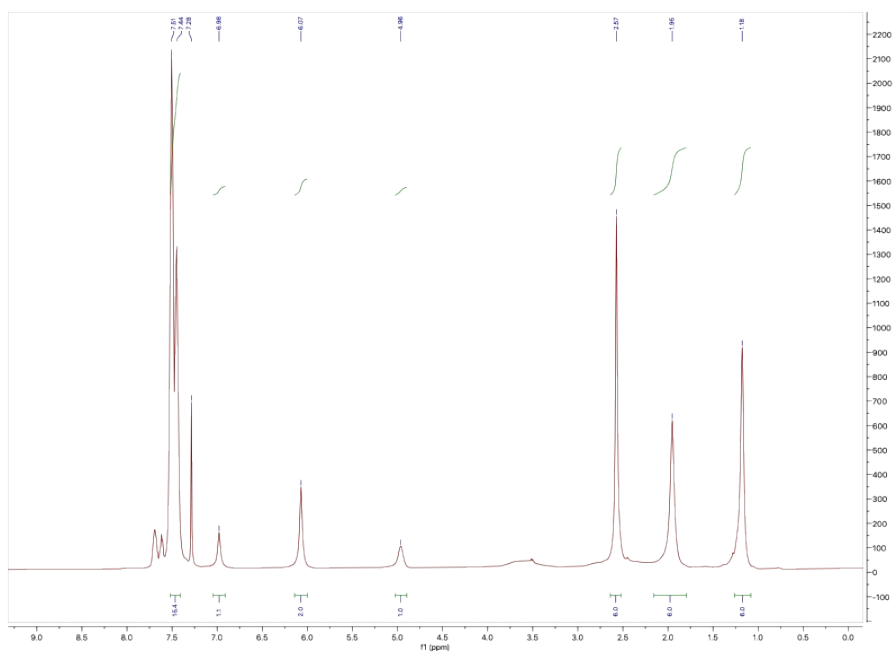

**Figure S23.**  $^1\text{H-NMR}$  spectrum of  $[\text{Cu}(\text{L}^{2\text{OiPr}})(\text{PPh}_3)]\text{PF}_6$  (**3**) in  $\text{CDCl}_3$ .

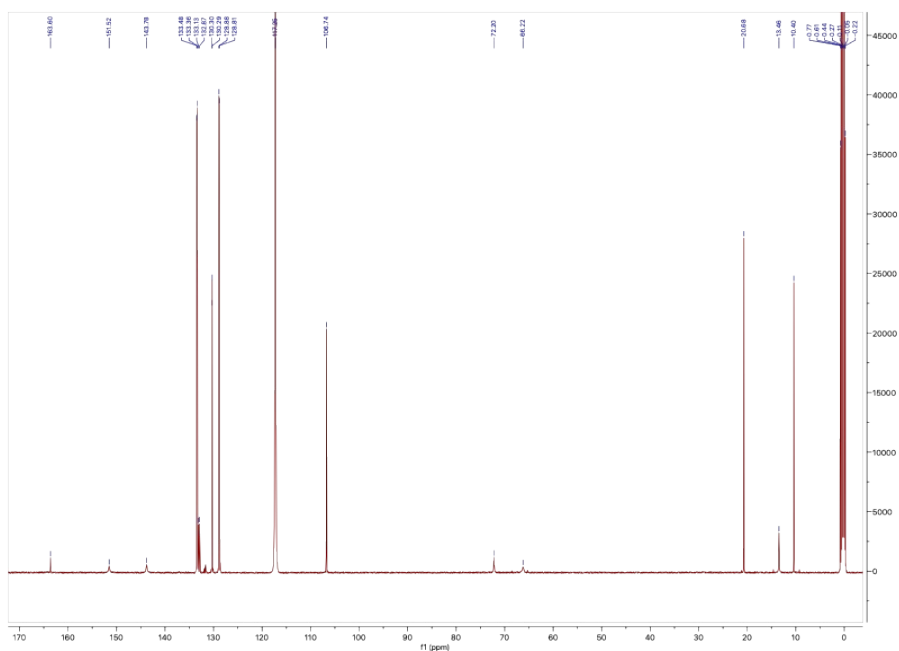

**Figure S24.**  $^{13}\text{C}\{^1\text{H}\}$ -NMR spectrum of  $[\text{Cu}(\text{L}^{2\text{OiPr}})(\text{PPh}_3)]\text{PF}_6$  (**3**) in  $\text{CD}_3\text{CN}$ .

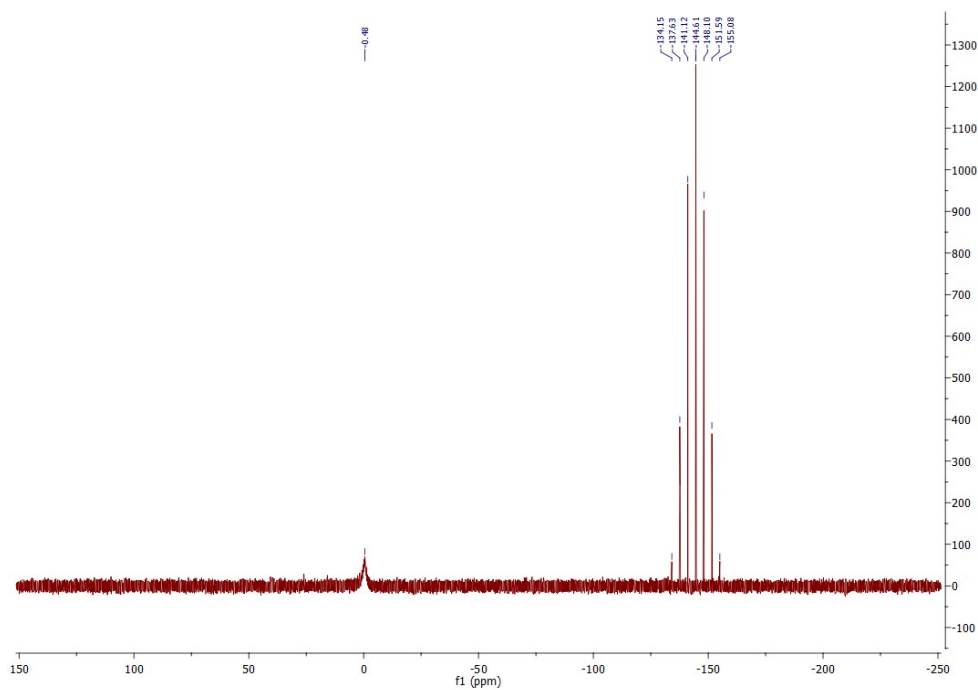

Figure S25.  $^{31}\text{P}\{^1\text{H}\}$ -NMR spectrum of  $[\text{Cu}(\text{L}^{2\text{OiPr}})(\text{PPh}_3)]\text{PF}_6$  (**3**) in  $\text{CD}_3\text{CN}$  at 293K.

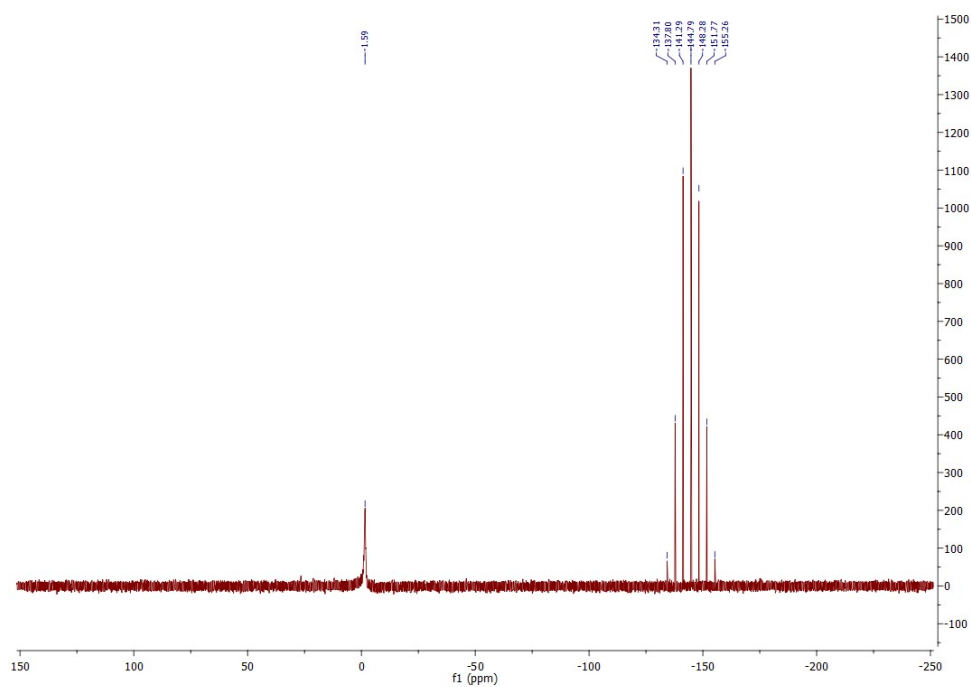

Figure S26.  $^{31}\text{P}\{^1\text{H}\}$ -NMR spectrum of  $[\text{Cu}(\text{L}^{2\text{OiPr}})(\text{PPh}_3)]\text{PF}_6$  (**3**) in  $\text{CD}_3\text{CN}$  at 243K.

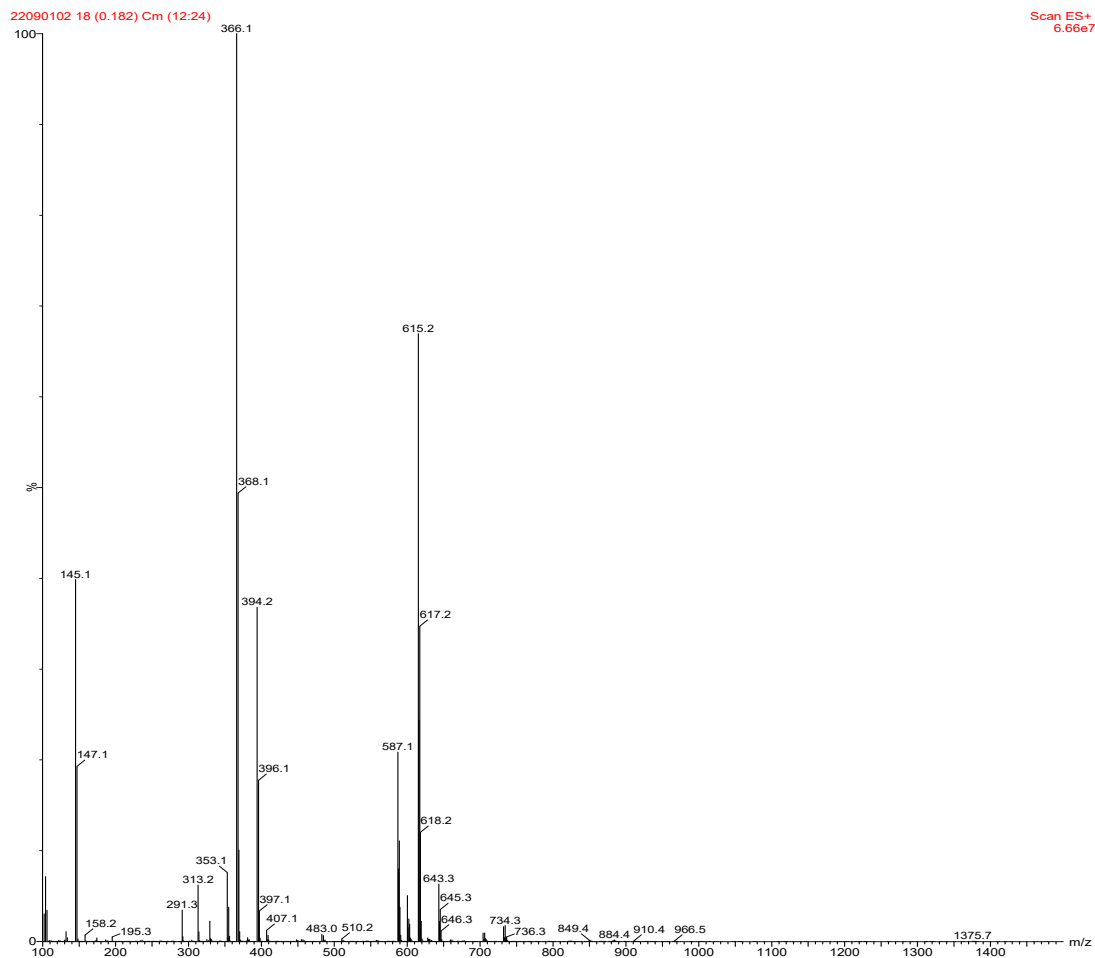

Figure S27. ESI-MS(+) spectrum of  $[\text{Cu}(\text{L}^{2\text{Oipr}})(\text{PPh}_3)]\text{PF}_6$  (**3**).

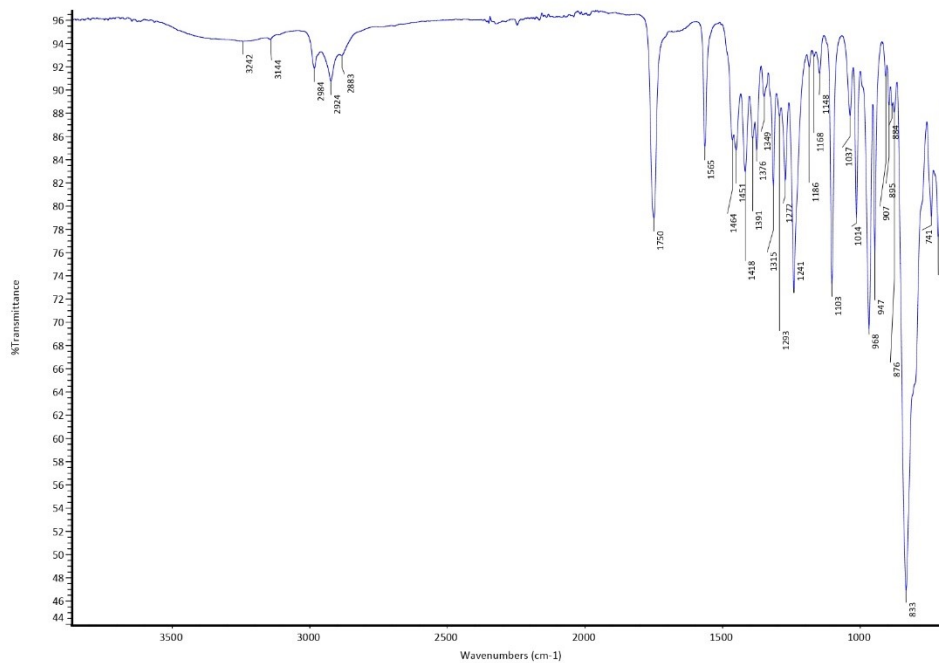

Figure S28. FT-IR spectrum of  $[\text{Cu}(\text{L}^{2\text{Oipr}})(\text{PTA})]\text{PF}_6$  (**4**).



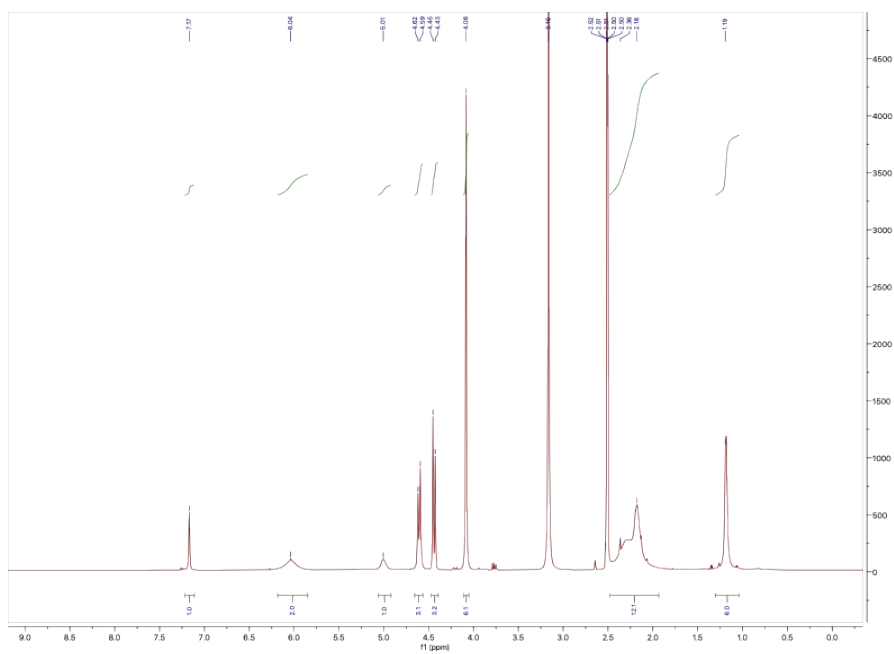

**Figure S29.**  $^1\text{H-NMR}$  spectrum of  $[\text{Cu}(\text{L}^{20\text{iPr}})(\text{PTA})]\text{PF}_6$  (**4**) in  $\text{DMSO-d}_6$ .

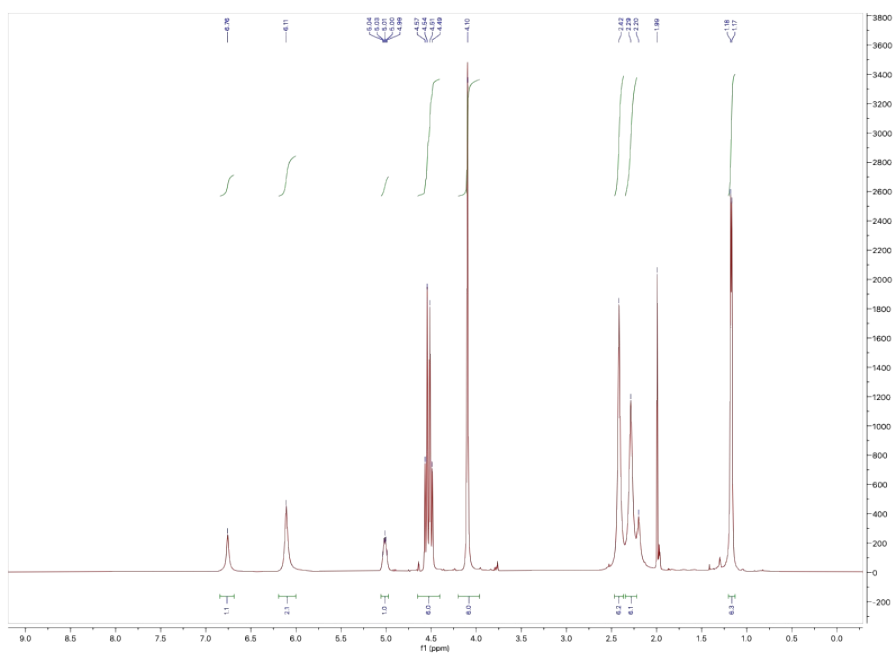

**Figure S30.**  $^1\text{H-NMR}$  spectrum of  $[\text{Cu}(\text{L}^{20\text{iPr}})(\text{PTA})]\text{PF}_6$  (**4**) in  $\text{CD}_3\text{CN}$ .

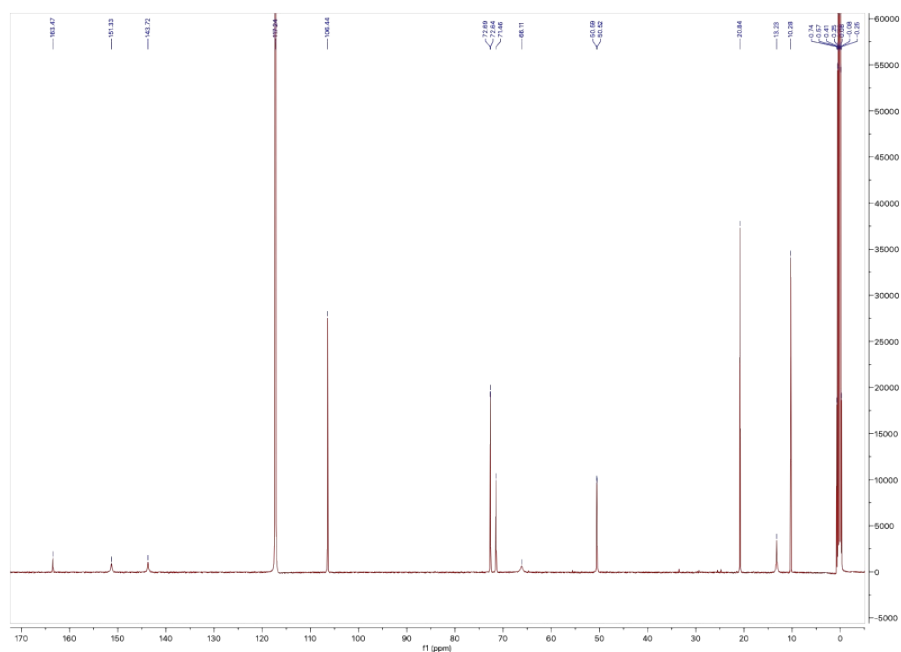

**Figure S31.**  $^{13}\text{C}\{^1\text{H}\}$ -NMR spectrum of  $[\text{Cu}(\text{L}^{2\text{OiPr}})(\text{PTA})]\text{PF}_6$  (**4**) in  $\text{CD}_3\text{CN}$ .

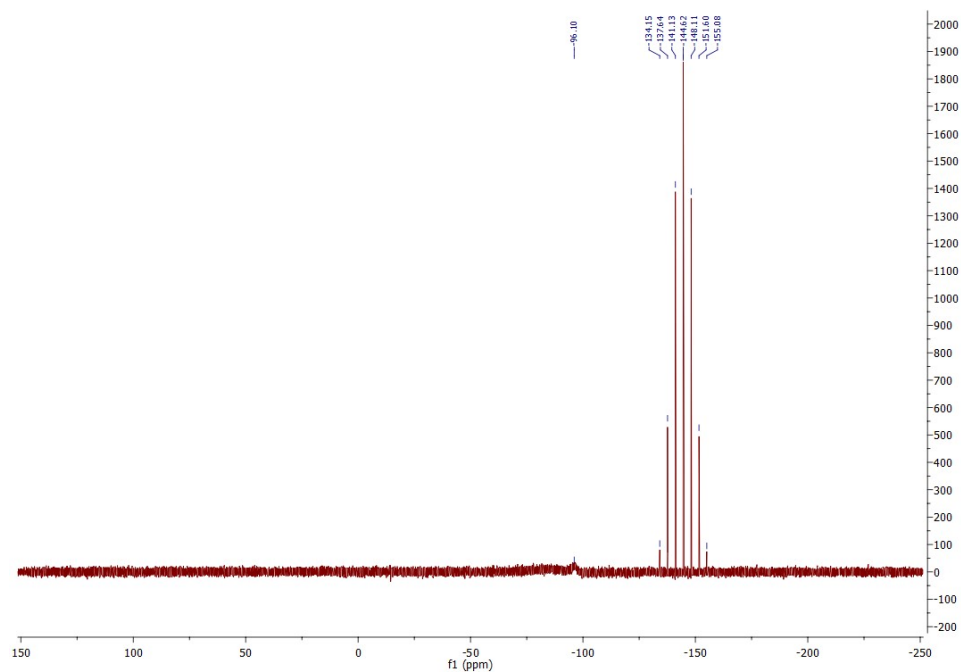

**Figure S32.**  $^{31}\text{P}\{^1\text{H}\}$ -NMR spectrum of  $[\text{Cu}(\text{L}^{2\text{OiPr}})(\text{PTA})]\text{PF}_6$  (**4**) in  $\text{CD}_3\text{CN}$  at 293K.

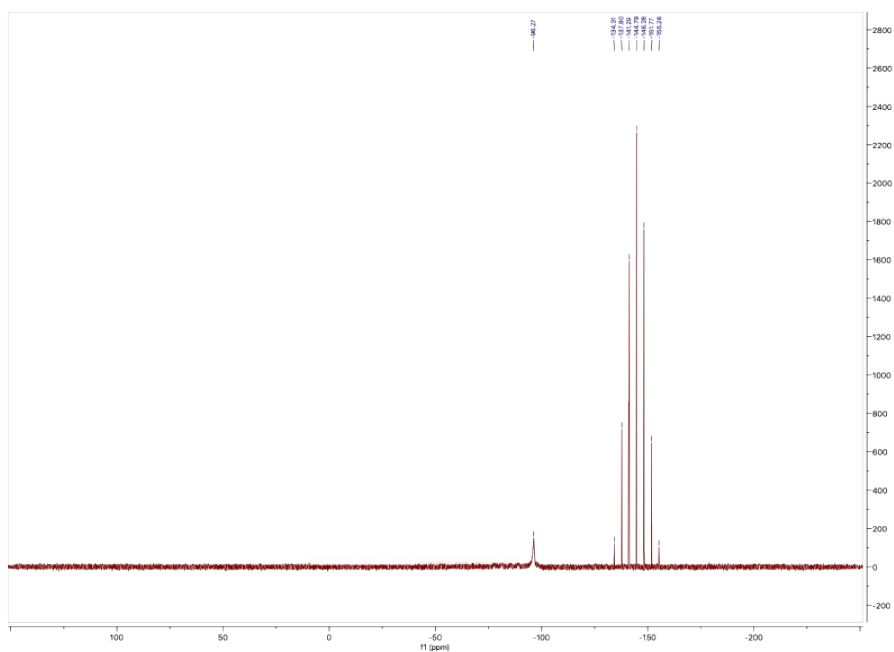

**Figure S33.**  $^{31}\text{P}\{^1\text{H}\}$ -NMR spectrum of  $[\text{Cu}(\text{L}^{2\text{O}i\text{Pr}})(\text{PTA})]\text{PF}_6$  (**4**) in  $\text{CD}_3\text{CN}$  at 243K.

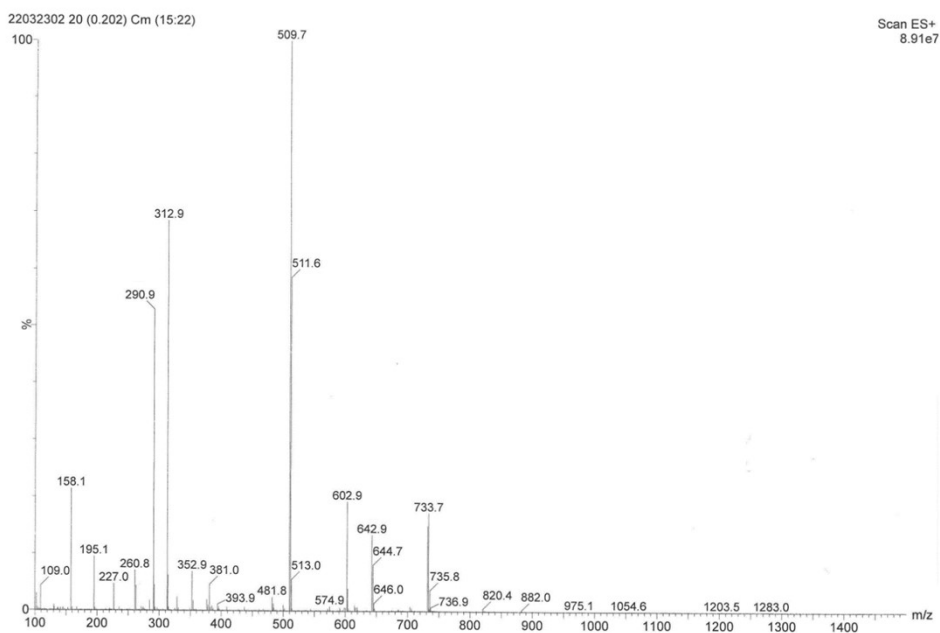

**Figure S34.** ESI-MS(+) spectrum in  $\text{CH}_3\text{CN}$  of  $[\text{Cu}(\text{L}^{2\text{O}i\text{Pr}})(\text{PTA})]\text{PF}_6$  (**4**).

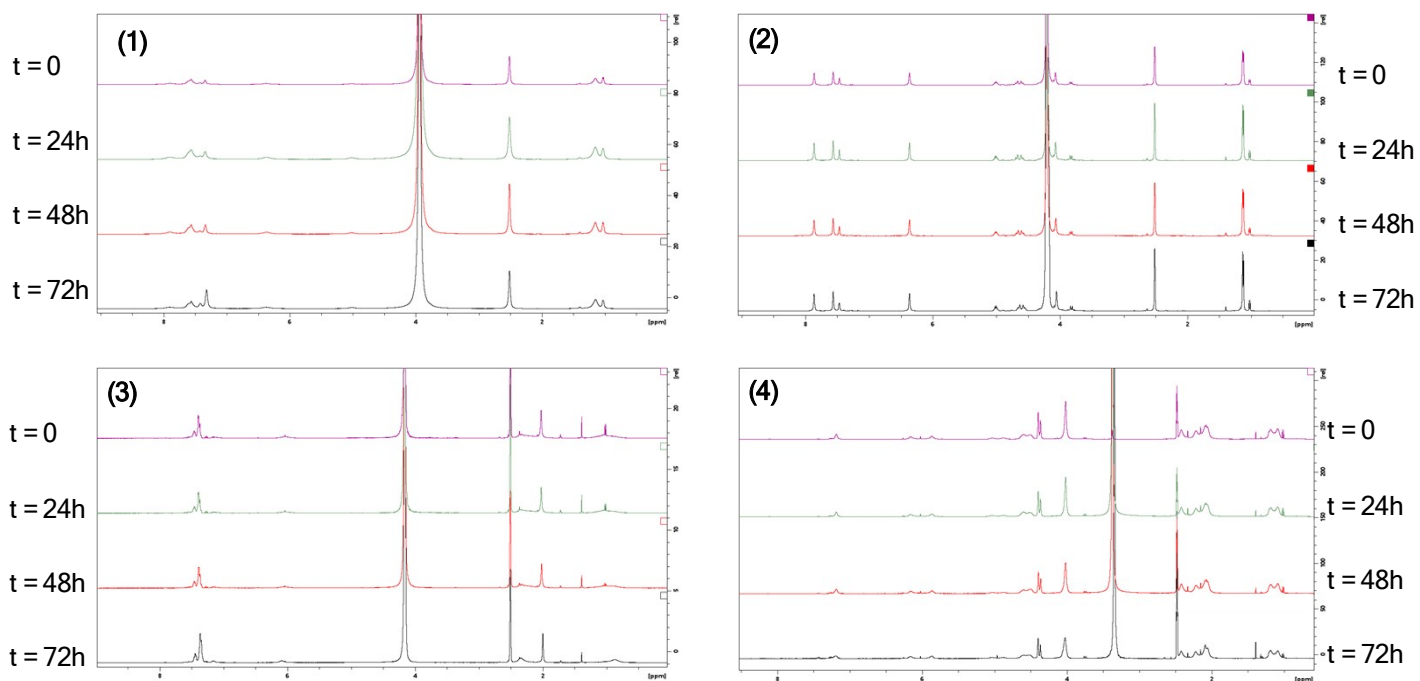

**Figure S35.** Stability Studies. The stability of the new complexes **1-4** in 0.5% DMSO/saline solution was also evaluated by using  $^1\text{H-NMR}$ .

**Table S1.** XPS data (BE, FWHM, experimental and theoretical atomic ratios and proposed assignments) collected on complex **(3)**.

| Sample     | Signal              | BE (eV) | FWHM (eV) | atomic ratios (exp.) | atomic ratios (theor.) | Assignment                   |
|------------|---------------------|---------|-----------|----------------------|------------------------|------------------------------|
| <b>(3)</b> | C1s                 | 284.70  | 1.6       | 11.3                 | 26                     | C-C + C-P (C1)               |
|            |                     | 286.0   | 1.6       | 4.3                  | 5                      | C-N (C2)                     |
|            |                     | 287.6   | 1.6       | 1.2                  | 1                      | C-O (C3) + imp.              |
|            |                     | 288.6   | 1.6       | 1                    | 1                      | COOR (C4) + imp              |
|            | N1s                 | 400.7   | 2.6       | N/Cu_tot = 4.4       | N/Cu_tot = 4           | N-C amine-like               |
|            | P2p <sub>3/2</sub>  | 132.2   | 3.8       |                      |                        | P-C P Ph <sub>3</sub> (P1)   |
|            |                     | 136.4   | 4.6       |                      |                        | P-F PF <sub>6</sub> (P2)     |
|            | F1s                 | 685.9   | 2.2       |                      |                        | F-P PF <sub>6</sub>          |
|            | Cu2p <sub>3/2</sub> | 932.8   | 2.5       | 1                    | 1                      | Cu(I) complex                |
|            |                     | 935.3   | 2.5       | 0.1                  | 0                      | Cu(II) Cu(OH) <sub>2</sub>   |
|            | O1s                 | 531.6   | 1.80      | 1.7                  | 1                      | O=C (+ impurities)           |
|            |                     | 532.5   | 1.80      | 1                    | 1                      | O-C                          |
|            |                     | 534.1   | 1.80      |                      |                        | physisorbed H <sub>2</sub> O |
